# Supplementary material for: Comparative Metabolomic Profiling of Citrullus spp. Fruits Provides Evidence for Metabolomic Divergence during Domestication
Source: MDPI journal article supplement (doi:10.3390/metabo11020078), 2021-01-28
Supplement: s1 [file s1]

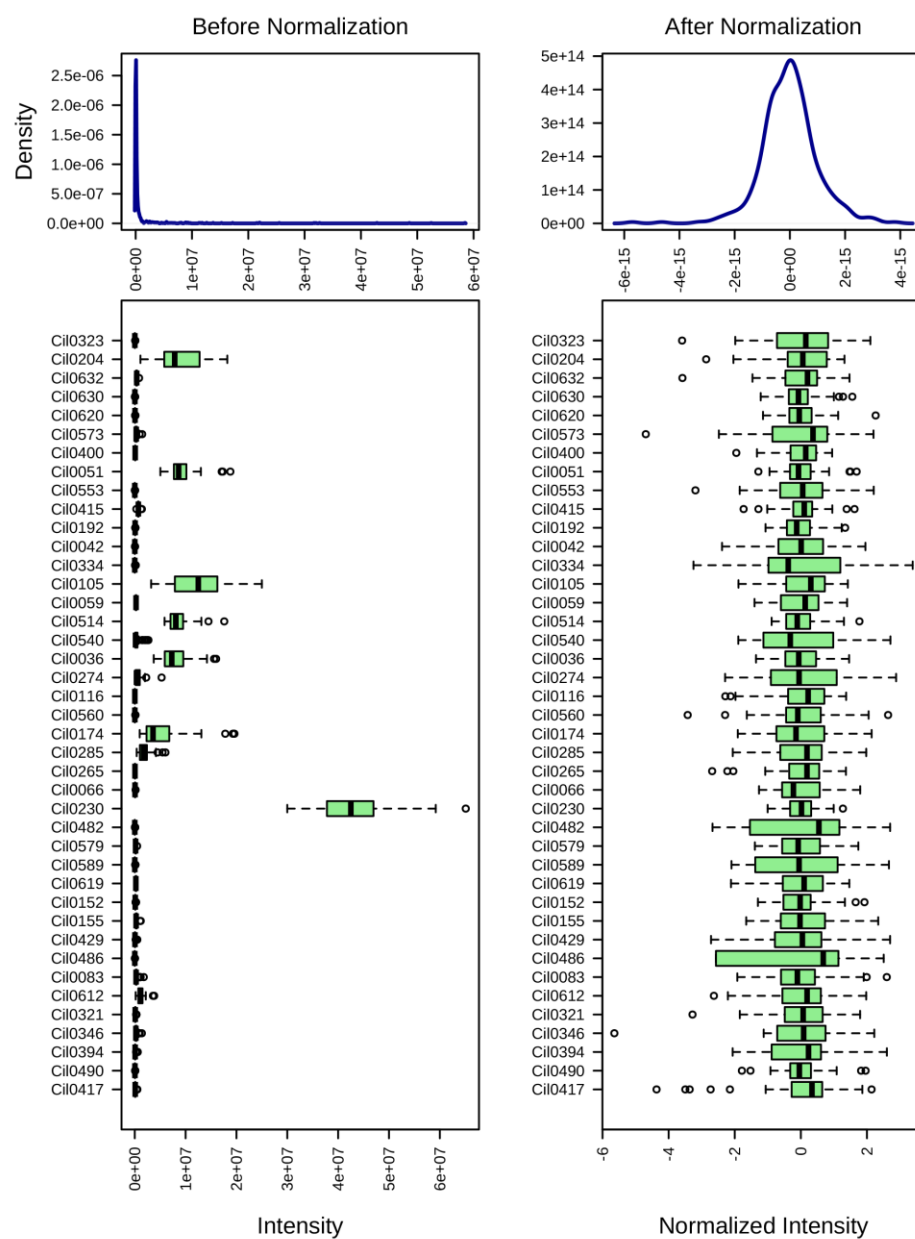

Figure S1. Comparison of metabolite contents distribution before and after normalization.

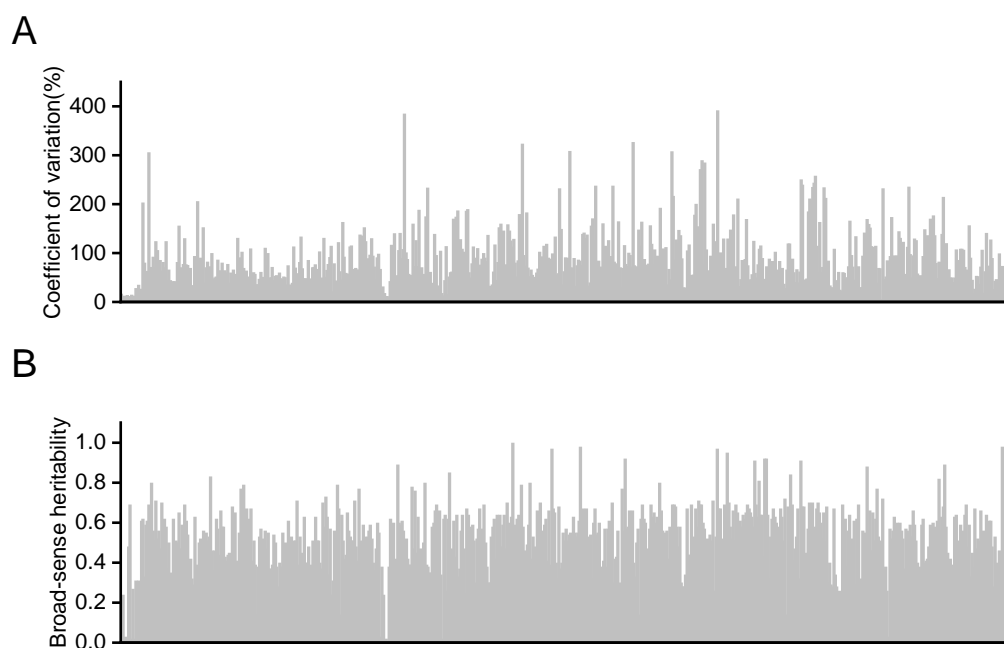

Figure S2. **(A)** Distribution of variation coefficients and **(B)** the broad-sense heritability of metabolites.

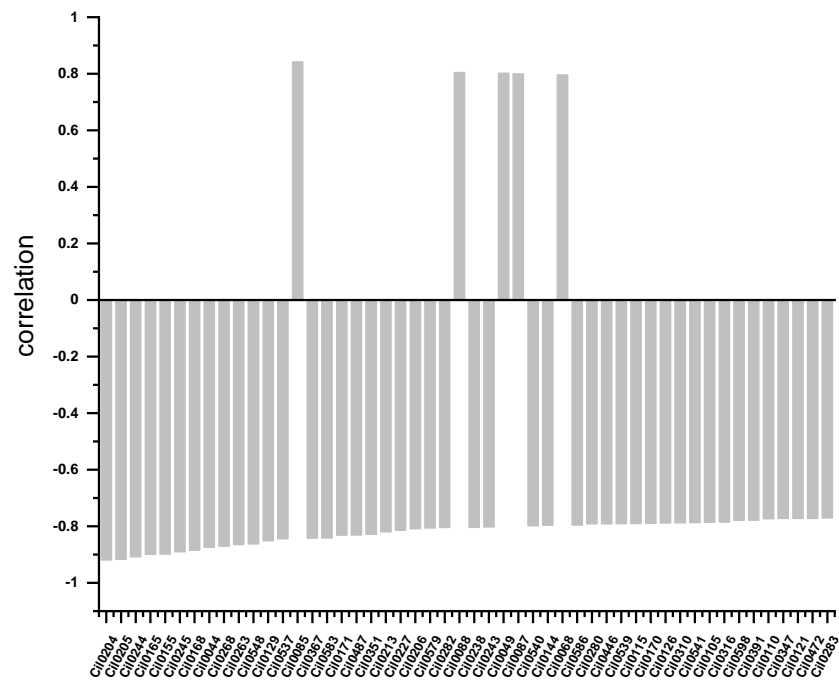

Figure S3. Correlation pattern of the top 50 compounds correlated with the *C.colocynthis* - *C.amarus* - *C. mucosospermus* - *C. lanatus* edible seed watermelon - *C. lanatus* Landrace - *C. lanatus* Improved. The top 50 largest absolute value of correlation coefficient in known metabolites are shown in this figure.

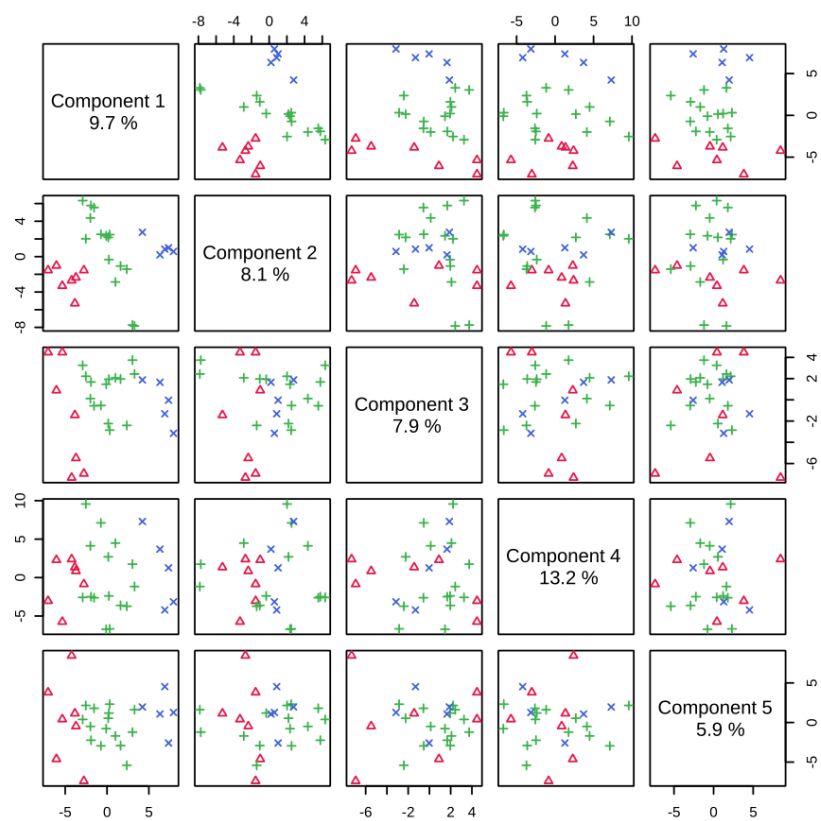

Figure S4. Pairwise scores plots between the top 5 components by PLS-DA analysis.

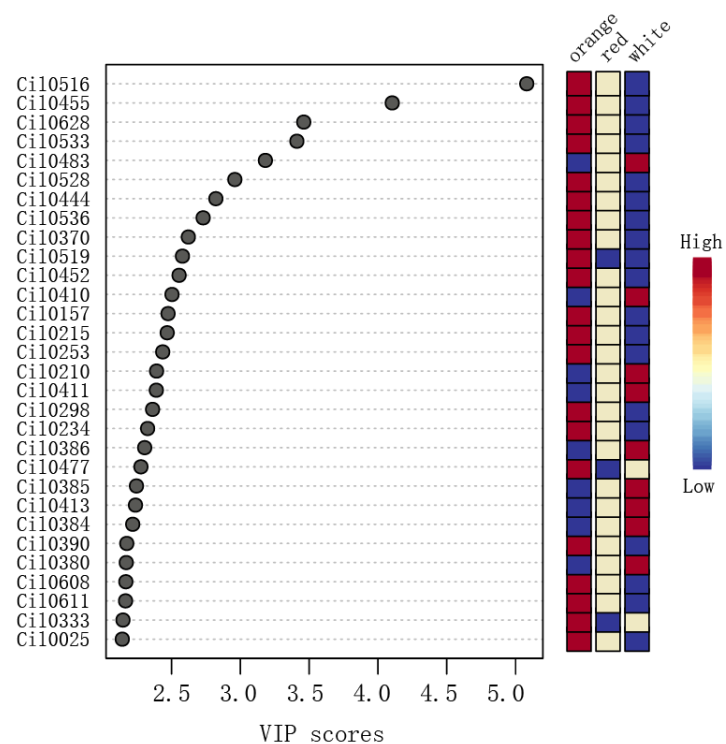

Figure S5. Important metabolic traits identified by PLS-DA analysis. The colored boxes on the right indicate the corresponding metabolite relative contents in each group.
